# Supplementary material
Source: ML conference proceedings conference paper supplement (https://openreview.net/forum?id=8Yno1MYsvP)
Supplement: supplementary_material [file gc.xlsx]

## Sheet: genomeconnect_hpo_questions_ful
Section	Question	HPO term	HPO code
Mother's Pregnancy	Amniotic fluid issue - Too much fluid (polyhydramnios) or too little fluid (oligohydramnios)	Abnormality of the amniotic fluid	HP:0001560
Mother's Pregnancy	Decreased fetal movement	Decreased fetal movement	HP:0001558
Mother's Pregnancy	Delivery complication	Abnormal delivery	HP:0001787
Mother's Pregnancy	Maternal health problem	Prenatal maternal abnormality	HP:0002686
Mother's Pregnancy	Placental issue	Abnormality of the placenta	HP:0100767
Mother's Pregnancy	Pregnancy exposure	Maternal teratogenic exposure	HP:0011438
Mother's Pregnancy	Prematurity	Premature birth	HP:0001622
Mother's Pregnancy	Umbilical cord issue	Abnormality of the umbilical cord	HP:0010881
Growth	General overgrowth	Generalized overgrowth	HP:0001548
Growth	Obesity	Obesity	HP:0001513
Growth	Uneven growth (one side larger/longer)	Hemihypertrophy	HP:0001528
Growth	Short stature	Short stature	HP:0004322
Growth	Undergrowth (failure to thrive)	Failure to thrive	HP:0001508
Growth	Growth hormone deficiency	Growth hormone deficiency	HP:0000824
Growth	Growth hormone excess	Growth hormone excess	HP:0000845
Growth	Tall stature	Tall stature	HP:0000098
Hormones/Endocrine	Type 2 diabetes	Non-insulin dependent diabetes	HP:0005978
Hormones/Endocrine	Type 1 diabetes	Insulin dependent diabetes	HP:0100651
Hormones/Endocrine	Delayed puberty	Delayed puberty	HP:0000823
Hormones/Endocrine	Diabetes insipidus	Diabetes insipidus	HP:0000873
Hormones/Endocrine	Growth hormone deficiency	Growth hormone deficiency	HP:0000824
Hormones/Endocrine	Early puberty	Precocious puberty	HP:0000826
Hormones/Endocrine	Hypogonadism	Hypogonadism	HP:0000135
Hormones/Endocrine	Adrenal hyperplasia	Adrenal hyperplasia	HP:0008221
Hormones/Endocrine	Hyperthyroidism	Hyperthyroidism	HP:0000836
Hormones/Endocrine	Hypothyroidism	Hypothyroidism	HP:0000821
Hormones/Endocrine	Goiter	Hypothyroidism	HP:0000836
Hormones/Endocrine	Parathyroid issue	Parathyroid dysfunction	HP:0011767
Cancer	Breast cancer	Breast carcinoma	HP:0003002
Cancer	Ovarian cancer	Ovarian neoplasm	HP:0100615
Cancer	Uterine cancer	Uterine neoplasm	HP:0010784
Cancer	Cervix cancer	Cervix cancer	HP:0030079
Cancer	Prostate cancer	Prostate neoplasm	HP:0100787
Cancer	Lung cancer	Neoplasm of the lungs	HP:0100526
Cancer	Colon and rectum (including polyps)	Colon cancer	HP:0003003
Cancer	Pancreatic cancer	Neoplasm of the pancreas	HP:0002894
Cancer	Bladder cancer	Bladder neoplasm	HP:0009725
Cancer	Kidney cancer	Renal neoplasm	HP:0009726
Cancer	Thyroid cancer	Neoplasm of the thyroid gland	HP:0100031
Cancer	Melanoma of skin	Melanoma	HP:0002861
Cancer	Non-melanoma skin cancer	Neoplasm of the skin	HP:0008069
Cancer	Brain or spine cancer	Neoplasm of the central nervous system	HP:0100006
Cancer	Blood cancer (including leukemia and lymphoma)	Abnormality of the blood and blood-forming tissues	HP:0001871
Head/Face/Neck	Chin differences	Abnormality of the chin	HP:0000306
Head/Face/Neck	Cleft lip and/or cleft palate	Oral cleft	HP:0000202
Head/Face/Neck	General face shape differences	Abnormal facial shape	HP:0001999
Head/Face/Neck	Hair differences (sparse, unusual texture)	Abnormality of the hair	HP:0001595
Head/Face/Neck	Inside of the mouth (teeth/gums/tongue) issues	Abnormality of the oral cavity	HP:0000163
Head/Face/Neck	Lips or outside of the mouth issues	Abnormality of the mouth	HP:0000153
Head/Face/Neck	Neck differences (short, broad, webbed, branchial anomalies)	Abnormality of the neck	HP:0000464
Head/Face/Neck	Nose differences	Abnormality of the nose	HP:0000366
Head/Face/Neck	Skull differences (macro/microcephaly, craniosynostosis)	Abnormality of the skull	HP:0000929
Head/Face/Neck	Throat/swallowing difficulties	Oral pharyngeal dysphagia	HP:0200136
Eyes/Vision	Eye movement issues (strabismus, nystagmus)	Abnormality of eye movement	HP:0000496
Eyes/Vision	Difference in eye size (microphthalmia/anophthalmia)	Abnormality of globe size	HP:0100887
Eyes/Vision	Unusual iris (spots, heterochromia)	Abnormality of the iris	HP:0000525
Eyes/Vision	Lens issue (cataract, ectopia lentis)	Abnormality of the lens	HP:0000517
Eyes/Vision	Major vision issues (blindness, color/night vision, photophobia)	Abnormality of vision	HP:0000504
Eyes/Vision	Farsightedness (hyperopia)	Hypermetropia	HP:0000540
Eyes/Vision	Nearsightedness (myopia)	Myopia	HP:0000545
Eyes/Vision	Optic nerve issues	Abnormality of the optic nerve	HP:0000587
Eyes/Vision	Retina issues (incl. macula)	Abnormality of the retina	HP:0000479
Eyes/Vision	Ptosis (drooping upper eyelid)	Ptosis	HP:0000508
Eyes/Vision	Coloboma (notched pupil)	Coloboma	HP:0000589
Ears/Hearing	Ear shape difference (over/under-developed, cupped, large)	Abnormality of the ear	HP:0000598
Ears/Hearing	Conductive hearing loss	Conductive hearing impairment	HP:0000405
Ears/Hearing	Sensorineural hearing loss (SNHL)	Sensorineural hearing impairment	HP:0000407
Ears/Hearing	Mixed hearing loss	Mixed hearing impairment	HP:0000410
Ears/Hearing	Hearing loss, unsure which type	Hearing impairment	HP:0000365
Ears/Hearing	Ringing in the ears (tinnitus)	Tinnitus	HP:0000360
Ears/Hearing	Hyperacusis (sound hypersensitivity)	Hyperacusis	HP:0010780
Ears/Hearing	Dizziness (vertigo)	Vertigo	HP:0002321
Brain/Nervous System	Brain and/or spinal cord issue (MRI structural issues)	Abnormality of the nervous system	HP:0000707
Brain/Nervous System	Cerebral palsy (CP)	Cerebral palsy	HP:0100021
Brain/Nervous System	Cognitive impairment	Cognitive impairment	HP:0100543
Brain/Nervous System	Coordination issues (clumsiness, movement)	Abnormality of coordination	HP:0011443
Brain/Nervous System	EEG abnormality	EEG abnormality	HP:0002353
Brain/Nervous System	Encephalopathy	Encephalopathy	HP:0001298
Brain/Nervous System	Hypertonia (increased muscle tone)	Hypertonia	HP:0001276
Brain/Nervous System	Hypotonia (low muscle tone, 'floppy')	Hypotonia	HP:0001290
Brain/Nervous System	Memory impairment	Memory impairment	HP:0002354
Brain/Nervous System	Unusual movements (NOT Parkinson's disease)	Abnormality of movement	HP:0100022
Brain/Nervous System	Parkinsonism	Parkinsonism	HP:0001300
Brain/Nervous System	Seizures	Seizures	HP:0001250
Behavior/Psychiatric	Autism spectrum disorder (ASD)	Autism Spectrum Disorder	HP:0000729
Behavior/Psychiatric	Bipolar disorder (manic depression)	Bipolar affective disorder	HP:0007302
Behavior/Psychiatric	Schizophrenia	Schizophrenia	HP:0100753
Behavior/Psychiatric	Repetitive or self-injurious behavior	Stereotypic behavior	HP:0000733
Behavior/Psychiatric	Aggressive/violent behavior	Aggressive/violent behavior	HP:0006919
Behavior/Psychiatric	Anxiety	Anxiety	HP:0000739
Behavior/Psychiatric	Depression	Depression	HP:0000716
Behavior/Psychiatric	Delusions	Delusions	HP:0000746
Behavior/Psychiatric	Hallucinations	Hallucinations	HP:0000738
Behavior/Psychiatric	Obsessive compulsive disorder (OCD)	Obsessive compulsive disorder	HP:0000722
Behavior/Psychiatric	Psychosis	Psychosis	HP:0000709
Behavior/Psychiatric	Short attention span (incl. ADD/ADHD)	Short attention span	HP:0000736
Skin	Atrophic scars	Atrophic scarring	HP:0001075
Skin	Café-au-lait spots	Multiple café-au-lait spots	HP:0007565
Skin	Hyperpigmentation	Hyperpigmentation	HP:0000953
Skin	Hypopigmentation	Hypopigmentation	HP:0001010
Skin	Decreased sweating (hypohidrosis)	Hypohidrosis	HP:0000966
Skin	Increased sweating (hyperhidrosis)	Hyperhidrosis	HP:0000975
Skin	Skin fragility	Fragile skin	HP:0001030
Skin	Skin sensitivity to sunlight	Skin photosensitivity	HP:0000992
Skin	Thick skin (keratoderma/hyperkeratosis)	Thick skin	HP:0001072
Skin	Hyperelastic skin	Hyperelastic skin	HP:0000974
Skin	Hypoelastic or 'saggy' skin (cutis laxa)	Cutis laxa	HP:0000973
Bone/Cartilage/Connective Tissue	Arm and/or leg bone differences since birth	Abnormality of limb bone morphology	HP:0002813
Bone/Cartilage/Connective Tissue	Curvature of the spine (scoliosis/kyphosis)	Abnormal curvature of the spine	HP:0010674
Bone/Cartilage/Connective Tissue	Flexible joints (hypermobile)	Joint hyperextensibility	HP:0001382
Bone/Cartilage/Connective Tissue	Frequent broken bones (brittle bones)	Increased susceptibility to fractures	HP:0002659
Bone/Cartilage/Connective Tissue	Finger and/or toe differences (extra/missing/fused)	Abnormality of the digits	HP:0011297
Bone/Cartilage/Connective Tissue	Hand differences (split hand, extra/missing bones)	Abnormality of the hand	HP:0001155
Bone/Cartilage/Connective Tissue	Foot differences (split foot, extra/missing bones)	Abnormality of the foot	HP:0001760
Bone/Cartilage/Connective Tissue	Hip dysplasia	Hip dysplasia	HP:0001385
Bone/Cartilage/Connective Tissue	Pectus carinatum ('pigeon chest')	Pectus carinatum	HP:0000768
Bone/Cartilage/Connective Tissue	Pectus excavatum ('funnel chest')	Pectus excavatum	HP:0000767
Bone/Cartilage/Connective Tissue	Skeletal dysplasia (incl. some forms of dwarfism)	Skeletal dysplasia	HP:0002652
Muscles	Facial muscle issue (palsy, chewing, eye movement)	Abnormality of facial musculature	HP:0000301
Muscles	Issue with muscle function	Abnormality of muscle physiology	HP:0011804
Muscles	Issue with internal muscle structure (biopsy)	Abnormality of muscle morphology	HP:0011805
Muscles	Issue with nerves connected to muscles (EMG/NCS)	Abnormality of the somatic nervous system	HP:0410009
Muscles	Muscle issues in the arms and/or legs (weakness/underdevelopment)	Abnormality of the musculature of the limbs	HP:0009127
Muscles	Muscle issues in the chest, back, and/or shoulders	Abnormality of the musculature of the thorax	HP:0009131
Muscles	Neck muscle issue (torticollis or neck weakness)	Abnormality of the musculature	HP:0003011
Heart/Blood Vessels	Aneurysm	Aneurysm	HP:0002617
Heart/Blood Vessels	Arrhythmia (irregular/fast/slow heart rhythm)	Cardiac arrhythmia	HP:0011675
Heart/Blood Vessels	Abnormal EKG (ECG)	Abnormal EKG	HP:0003115
Heart/Blood Vessels	Arterial dissection	Arterial dissection	HP:0005294
Heart/Blood Vessels	Cardiomyopathy	Cardiomyopathy	HP:0001638
Heart/Blood Vessels	Fainting (syncope)	Abnormality of the cardiovascular system	HP:0001626
Heart/Blood Vessels	Heart defect (congenital)	Malformation of the heart or great vessels	HP:0002564
Heart/Blood Vessels	High blood pressure (hypertension)	Hypertension	HP:0000822
Heart/Blood Vessels	High cholesterol (hypercholesterolemia)	Hypercholesterolemia	HP:0003124
Heart/Blood Vessels	Stroke	Stroke	HP:0001297
Lungs/Breathing	Asthma	Asthma	HP:0002099
Lungs/Breathing	Chronic lung issues (exclude acute infections)	Abnormality of the respiratory system	HP:0002086
Lungs/Breathing	Decreased lung function	Decreased pulmonary function	HP:0005952
Lungs/Breathing	Diaphragm issues (hernia/weakness)	Abnormality of the diaphragm	HP:0000775
Lungs/Breathing	Respiratory insufficiency	Respiratory insufficiency	HP:0002093
Lungs/Breathing	Restrictive lung disease	Restrictive lung disease	HP:0002091
Lungs/Breathing	Unusual breathing patterns (apnea/hyperventilation/tachypnea)	Abnormal pattern of respiration	HP:0002793
Lungs/Breathing	Upper respiratory tract issues (larynx/trachea/bronchi)	Abnormality of the upper respiratory tract	HP:0002087
Digestive System	Feeding difficulties	Feeding difficulties	HP:0011968
Digestive System	Esophagus issues (reflux/inflammation/stricture)	Abnormality of the esophagus	HP:0002031
Digestive System	Stomach issues (hernia/pyloric stenosis/delayed emptying)	Abnormality of the stomach	HP:0002577
Digestive System	Pancreas issues (pancreatitis/cysts)	Abnormality of the pancreas	HP:0001732
Digestive System	Liver issues (hepatomegaly/cirrhosis/hepatitis/cysts)	Abnormality of the liver	HP:0001392
Digestive System	Dysmotility (ileus/intestinal pseudo-obstruction)	Gastrointestinal dysmotility	HP:0002579
Digestive System	Intestines issues (malabsorption/malrotation/polyps/IBD)	Abnormality of the intestine	HP:0002242
Digestive System	Soiling/defecation problems	Abnormality of the large intestine	HP:0002250
Digestive System	Anus issues (anorectal malformation)	Abnormality of the anus	HP:0004378
Kidney/Bladder/Genitals	Bladder issues (stones/size/overactive/incontinence)	Abnormality of the bladder	HP:0000014
Kidney/Bladder/Genitals	Abnormal internal or external sex organ (DSD)	Abnormal sex determination	HP:0012244
Kidney/Bladder/Genitals	Kidney function issue (failure/filtration/absorption)	Renal insufficiency	HP:0000083
Kidney/Bladder/Genitals	Kidney structure issue (size/missing/ectopia)	Kidney malformation	HP:0012210
Kidney/Bladder/Genitals	Female sex organ disorder (labia/vagina/uterus/ovaries)	Abnormality of FEMALE genitalia	HP:0010460
Kidney/Bladder/Genitals	Genitalia function (infertility/impotence/ovarian failure)	Genital functional abnormality	HP:0000080
Kidney/Bladder/Genitals	Male sex organ disorder (penis/scrotum/testes/prostate)	Abnormality of MALE genitalia	HP:0010461
Kidney/Bladder/Genitals	Urethra issue (formation/blockage/hypospadias)	Abnormality of the urethra	HP:0000795
Kidney/Bladder/Genitals	Ureter issue (size/formation/blockage/missing)	Abnormality of the ureter	HP:0000069
Kidney/Bladder/Genitals	Urine issues (hematuria/proteinuria/color/odor)	Abnormality of the urine	HP:0003110
Immune System	Autoimmune disorder (e.g., Hashimoto, lupus, ITP)	Autoimmunity	HP:0002960
Immune System	Immunodeficiency (T-cell/combined/other)	Immunodeficiency	HP:0002721
Immune System	Increased inflammatory response	Increased inflammatory response	HP:0012647
Immune System	Recurrent infections	Recurrent infections	HP:0002719
Immune System	Rheumatoid arthritis (juvenile/adult)	Rheumatoid arthritis	HP:0001370
Blood/Bleeding	Blood clot (veins/arteries; thrombosis)	Abnormal thrombosis	HP:0001977
Blood/Bleeding	Blood clotting disorder (too fast/too slow)	Abnormality of coagulation	HP:0001928
Blood/Bleeding	Easy bleeding (with little/no trauma)	Bleeding with minor or no trauma	HP:0011889
Blood/Bleeding	Easy bruising (with little/no trauma)	Easy bruising	HP:0000978
Blood/Bleeding	Persistent bleeding after trauma	Persistent bleeding after trauma	HP:0001934
Blood/Bleeding	Extramedullary hematopoiesis	Extramedullary hematopoiesis	HP:0001978
Blood/Bleeding	Frequent nosebleeds (epistaxis)	Epistaxis	HP:0000421
Blood/Bleeding	Platelet abnormalities (too many/too few)	Abnormality of thrombocytes	HP:0001872
Blood/Bleeding	Red blood cell abnormalities (anemia/polycythemia/thalassemia)	Abnormality of erythrocytes	HP:0001877
Blood/Bleeding	White blood cell abnormalities (leukocytosis/leukopenia)	Abnormality of leukocytes	HP:0001881
Oral Health	Gum disease (loss of tissue around teeth)	Periodontitis	HP:0000704
Oral Health	Gingivitis (inflamed/red/swollen gums)	Gingival inflammation	HP:0000230
Oral Health	Oral herpes (blisters/ulcers on gums/tongue)	Oral herpes	HP:0410028
Oral Health	Spontaneous tooth fracture	Spontaneous tooth fracture	HP:0025124
Oral Health	Unusual number of teeth (more/less)	Abnormal number of teeth	HP:0006483
Oral Health	Malformed teeth	Malformed teeth	HP:0006482
Oral Health	Abnormality of primary teeth (baby teeth problems)	Abnormality of primary teeth	HP:0006481
Oral Health	Abnormality of the dental root	Abnormality of the dental root	HP:0006486
Oral Health	Abnormality of dental pulp	Abnormality of dental pulp	HP:0006479
Oral Health	Over/under bite (malocclusion)	Misalignment of teeth	HP:0000692
