# Supplementary material
Source: ML conference proceedings conference paper supplement (https://openreview.net/forum?id=8Yno1MYsvP)
Supplement: supplementary_material [file mapped_gc.xlsx]

## Sheet: Sheet1
	Section	Question	true_term	HPO_code	true_CUI	agent_term	agent_code	agent_CUI	confidence	phetag_term	phenotagger_code	phetag_CUI	overmapping	BERT_term	BERT_code	BERT_CUI	overmapping.1	meta_term	meta_CUI	overmapping.2	ctakes_CUI	overmapping.3	GPT5_term	GPT5_code	GPT5_CUI
0	Mother's Pregnancy	Amniotic fluid issue - Too much fluid (polyhydramnios) or too little fluid (oligohydramnios)	Abnormality of the amniotic fluid	HP:0001560	C0266781	Abnormality of the amniotic fluid	HP:0001560	C0266781	0.9	Amniotic fluid issue	HP:0001560	C0266781	2	Amniotic fluid issue - Too much fluid, polyhydramnios, oligohydramnios	HP:0001560	C0266781	2	Oligohydramnios, Polyhydramnios, Problem, Too little, Too much	C0079924	4	C0037313	2	Abnormality of the amniotic fluid	HP:0001560	C0266781
1	Mother's Pregnancy	Decreased fetal movement	Decreased fetal movement	HP:0001558	C0235659	Decreased fetal movement	HP:0001558	C0235659	1	Decreased fetal movement	HP:0001558	C0235659		Decreased fetal movement	HP:0001558	C0235659		Reduced fetal movement	C0235659		C0235659	3	Decreased fetal movement	HP:0001558	C0235659
2	Mother's Pregnancy	Delivery complication	Abnormal delivery	HP:0001787	C0549629	Delivery complication	HP:0001787	C0549629	1	Delivery complication	HP:0001787	C0549629		Delivery complication	HP:0001787	C0549629		Complication of delivery	C0852962		C0009566		Abnormality of prenatal development or birth	HP:0001197	C4025797
3	Mother's Pregnancy	Maternal health problem	Prenatal maternal abnormality	HP:0002686	C4531020	Prenatal maternal abnormality	HP:0002686	C4531020	1					Maternal health problem	HP:0002686	C4531020		Maternal health problem	C4531020		C0033213
4	Mother's Pregnancy	Placental issue	Abnormality of the placenta	HP:0100767	C1306893	Abnormality of the placenta	HP:0100767	C1306893	0.9	Placental issue Phenotype	HP:0100767	C1306893		Placental issue	HP:0100767	C1306893		Anomaly of placenta	C1306893		C0033213		Abnormality of the placenta	HP:0011410	C0007876
5	Mother's Pregnancy	Pregnancy exposure	Maternal teratogenic exposure	HP:0011438	C4023357	Maternal teratogenic exposure	HP:0011438	C4023357	1					Pregnancy exposure	HP:0031437	C3544104		Pregnancy exposure	C3544104		C0419415	2
6	Mother's Pregnancy	Prematurity	Premature birth	HP:0001622	C0151526	Preterm birth	HP:0001622	C0151526	0.9									Premature Birth, Infant, Premature	C0151526	1	C0021294		Premature birth	HP:0001622	C0151526
7	Mother's Pregnancy	Umbilical cord issue	Abnormality of the umbilical cord	HP:0010881	C0266785	Abnormality of the umbilical cord	HP:0010881	C0266785	0.9	Umbilical cord issue	HP:0010881	C0266785		Umbilical cord issue	HP:0010881	C0266785		Abnormal umbilical cord	C0266785		C0021294	1	Abnormality of the umbilical cord	HP:0001191	C1840535
8	Growth	General overgrowth	Generalized overgrowth	HP:0001548	C1849265	Generalized overgrowth	HP:0001548	C1849265	1	Generalized overgrowth	HP:0001548	C1849265		General overgrowth	HP:0001548	C1849265		Generalized overgrowth, Overgrowth	C1849265	1	C0021294	1	Generalized overgrowth	HP:0001548	C1849265
9	Growth	Obesity	Obesity	HP:0001513	C0028754	Obesity	HP:0001513	C0028754	0.7	Obesity	HP:0001513	C0028754		Obesity	HP:0001513	C0028754		Obesity, BODY MASS INDEX QUANTITATIVE TRAIT LOCUS 20, Obesity, CTCAE	C0028754	2	C0028754	1	Obesity	HP:0001513	C0028754
10	Growth	Uneven growth (one side larger/longer)	Hemihypertrophy	HP:0001528	C0332890	Hemihypertrophy	HP:0001528	C0332890	1												C0028754	1	Hemihyperplasia	HP:0001528	C0332890
11	Growth	Short stature	Short stature	HP:0004322	C0349588	Short stature	HP:0004322	C0349588	0.7	Short stature	HP:0004322	C0349588		Short stature	HP:0004322	C0349588		Short stature	C0349588		C0349588	1	Short stature	HP:0004322	C0349588
12	Growth	Undergrowth (failure to thrive)	Failure to thrive	HP:0001508	C2315100	Failure to thrive	HP:0001508	C2315100	0.9	Failure to thrive	HP:0001508	C2315100	1	Undergrowth, failure to thrive	HP:0001508	C2315100	1	Failure to Thrive, Failure to thrive in infant, Pediatric failure to thrive, Undergrowth	C2315100	3	C0349589	1	Failure to thrive	HP:0001508	C2315100
13	Growth	Growth hormone deficiency	Growth hormone deficiency	HP:0034323	C0271561	Growth hormone deficiency	HP:0034323	C0271561	1	Growth hormone deficiency	HP:0000824	C5539399		Growth hormone deficiency	HP:0000824	C5539399		Isolated somatotropin deficiency, Decreased response to growth hormone stimulation test, Somatotropin deficiency	C0271561	2	C0271561	1	Growth hormone deficiency	HP:0000824	C5539399
14	Growth	Growth hormone excess	Growth hormone excess	HP:0000845	C0235986	Growth hormone excess	HP:0000845	C0235986	1	Growth hormone excess	HP:0000845	C0235986		Growth hormone excess	HP:0000845	C0235986		Growth hormone excess	C0235986		C0271562	1	Growth hormone excess
15	Growth	Tall stature	Tall stature	HP:0000098	C0241240	Tall stature	HP:0000098	C0241240	1	Tall stature	HP:0000098	C0241240		Tall stature	HP:0000098	C0241240		Tall stature	C0241240		C0241240	1	Tall stature	HP:0000098	C0241240
16	Hormones/Endocrine	Type 2 diabetes	Non-insulin dependent diabetes	HP:0005978	C0011860	Type II diabetes	HP:0005978	C0011860	1	Type II diabetes	HP:0005978	C0011860		Type 2 diabetes	HP:0100651	C0011854		Diabetes Mellitus, Non-Insulin-Dependent	C0011860		C0011860	1	Type 2 diabetes mellitus	HP:0005978	C0011860
17	Hormones/Endocrine	Type 1 diabetes	Insulin dependent diabetes	HP:0100651	C0011854	Type I diabetes	HP:0100651	C0011854	1	Type I diabetes	HP:0100651	C0011854		Type 1 diabetes	HP:0100651	C0011854		Diabetes Mellitus, Insulin-Dependent	C0011854		C0011854	1	Diabetes mellitus	HP:0000819	C0011849
18	Hormones/Endocrine	Delayed puberty	Delayed puberty	HP:0000823	C0034012	Delayed puberty	HP:0000823	C0034012	1	Delayed puberty	HP:0000823	C0034012		Delayed puberty	HP:0000823	C0034012		Delayed Puberty, Delayed Puberty, CTCAE	C0034012	1	C0034012		Delayed puberty	HP:0000823	C0034012
19	Hormones/Endocrine	Diabetes insipidus	Diabetes insipidus	HP:0000873	C0011848	Diabetes insipidus	HP:0000873	C0011848	1	Diabetes insipidus	HP:0000873	C0011848		Diabetes insipidus	HP:0000873	C0011848		Diabetes Insipidus	C0011848		C0011848	1	Diabetes insipidus	HP:0000873	C0011848
20	Hormones/Endocrine	Growth hormone deficiency	Growth hormone deficiency	HP:0034323	C0271561	Growth hormone deficiency	HP:0034323	C0271561	1	Growth hormone deficiency	HP:0000824	C5539399		Growth hormone deficiency	HP:0000824	C5539399		Isolated somatotropin deficiency, Decreased response to growth hormone stimulation test, Somatotropin deficiency	C0271561	2	C0271561		Growth hormone deficiency	HP:0000824	C5539399
21	Hormones/Endocrine	Early puberty	Precocious puberty	HP:0000826	C0034013	Precocious puberty	HP:0000826	C0034013	0.9	Precocious puberty	HP:0000826	C0034013		Early puberty	HP:0000826	C0034013		Precocious Puberty	C0034013		C0034013		Precocious puberty	HP:0000823	C0034012
22	Hormones/Endocrine	Hypogonadism	Hypogonadism	HP:0000135	C0020619	Hypogonadism	HP:0000135	C0020619	1	Hypogonadism	HP:0000135	C0020619		Hypogonadism	HP:0000135	C0020619		Hypogonadism	C0020619		C0020619		Hypogonadism	HP:0000135	C0020619
23	Hormones/Endocrine	Adrenal hyperplasia	Adrenal hyperplasia	HP:0008221	C1621895	Adrenal hyperplasia	HP:0008221	C1621895	1	Adrenal hyperplasia	HP:0008221	C1621895		Adrenal hyperplasia	HP:0008221	C1621895		Congenital adrenal hyperplasia, Adrenal hyperplasia	C1621895	1	C1621895		Adrenal hyperplasia	HP:0000848	C0240783
24	Hormones/Endocrine	Hyperthyroidism	Hyperthyroidism	HP:0000836	C0020550	Hyperthyroidism	HP:0000836	C0020550	1	Hyperthyroidism	HP:0000836	C0020550		Hyperthyroidism	HP:0000836	C0020550		Hyperthyroidism, Hyperthyroidism, CTCAE	C0020550	1	C0020550	2	Hyperthyroidism	HP:0000821	C0020676
25	Hormones/Endocrine	Hypothyroidism	Hypothyroidism	HP:0000821	C0020676	Hypothyroidism	HP:0000821	C0020676	0.7	Hypothyroidism	HP:0000821	C0020676		Hypothyroidism	HP:0000821	C0020676		Hypothyroidism, Hypothyroidism, CTCAE	C0020676	1	C0020676	1	Hypothyroidism	HP:0000821	C0020676
26	Hormones/Endocrine	Goiter	Goiter	HP:0000853	C0018021	Goiter	HP:0000853	C0018021	1	Goiter	HP:0000853	C0018021		Goiter	HP:0000853	C0018021		Goiter	C0018021		C0018021	1	Goiter	HP:0000855	C0021655
27	Hormones/Endocrine	Parathyroid issue	Parathyroid dysfunction	HP:0011767	C4023198	Abnormality of the parathyroid gland	HP:0000828	C4025822	0.9	Parathyroid dysfunction	HP:0011767	C4023198		Parathyroid issue	HP:0011767	C4023198		Parathyroid issue	C4531016		C0018022	1	Abnormality of the parathyroid gland	HP:0000858	C0156404
28	Cancer	Breast cancer	Breast carcinoma	HP:0003002	C0678222	Breast carcinoma	HP:0003002	C0678222	1	Breast carcinoma	HP:0003002	C0678222		Breast cancer	HP:0003002	C0678222		Breast Carcinoma, Malignant neoplasm of breast, Childhood Breast Carcinoma	C0678222	2	C0678222	1	Breast carcinoma	HP:0003002	C0678222
29	Cancer	Ovarian cancer	Ovarian neoplasm	HP:0100615	C0919267	Ovarian cancer	HP:0100615	C0919267	1	Ovarian neoplasm	HP:0100615	C0919267		Ovarian cancer	HP:0100615	C0919267		Carcinoma, Ovarian Epithelial, ovarian neoplasm, Malignant neoplasm of ovary	C0919267	2	C0678223	1	Ovarian carcinoma	HP:0100613	C4022012
30	Cancer	Uterine cancer	Uterine neoplasm	HP:0010784	C0153567	Uterine cancer	HP:0010784	C0153567	1	Uterine neoplasm	HP:0010784	C0153567		Uterine cancer	HP:0010784	C0153567		Uterine Cancer	C0153567		C0153567	1	Neoplasm of the uterus	HP:0100685	C4021997
31	Cancer	Cervix cancer	Cervix cancer	HP:0030079	C4048328	Cervix cancer	HP:0030079	C4048328	1	Cervix cancer	HP:0030079	C4048328		Cervix cancer	HP:0030079	C4048328		cervical cancer, Cervix carcinoma	C4048328	1	C4048328	1	Neoplasm of the cervix	HP:0100612	C0028880
32	Cancer	Prostate cancer	Prostate neoplasm	HP:0100787	C0033578	Prostate cancer	HP:0012125	C0376358	1	Prostate cancer	HP:0012125	C0376358		Prostate cancer	HP:0012125	C0376358		Malignant neoplasm of prostate, Prostate carcinoma	C0376358,	1	C4048329	1	Neoplasm of the prostate	HP:0100787	C0033578
33	Cancer	Lung cancer	Neoplasm of the lungs	HP:0100526	C0242379	Lung cancer	HP:0100526	C0242379	1	Neoplasm of the lungs	HP:0100526	C0242379		Lung cancer	HP:0100526	C0242379		Carcinoma of lung, Malignant neoplasm of lung, Primary malignant neoplasm of lung	C0242379	2	C0242379	1	Neoplasm of the lung	HP:0100526	C0242379
34	Cancer	Colon cancer and rectum cancer (including polyps)	Colon cancer	HP:0003003	C0007102	Neoplasm of the large intestine	HP:0100834	C0009404	0.85									polyps, Colon Carcinoma, Malignant tumor of colon, Rectal Carcinoma	C0007102	3	C0242380	1
35	Cancer	Pancreatic cancer	Neoplasm of the pancreas	HP:0002894	C0346647	Pancreatic carcinoma	HP:0100634	C0009404	0.9	Neoplasm of the pancreas	HP:0002894	C0346647		Pancreatic cancer	HP:0002894	C0346647		Pancreatic carcinoma, Malignant neoplasm of pancreas	C0346647	1	C0346647	2	Neoplasm of the pancreas	HP:0006727	C1961099
36	Cancer	Bladder cancer	Bladder neoplasm	HP:0009725	C0005695	Bladder cancer	HP:0009725	C0005695	1	Bladder neoplasm	HP:0009725	C0005695		Bladder cancer	HP:0009725	C0005695		Bladder Neoplasm, Carcinoma of bladder, Childhood Bladder Carcinoma, Malignant neoplasm of urinary bladder	C0005695	3	C0346648	1	Neoplasm of the urinary bladder	HP:0100515	C4477056
37	Cancer	Kidney cancer	Renal neoplasm	HP:0009726	C1378703	Kidney cancer	HP:0009726	C1378703	1	Renal neoplasm	HP:0009726	C1378703		Kidney cancer	HP:0009726	C1378703		Renal carcinoma, Malignant neoplasm of kidney	C1378703	1	C0346649	2	Neoplasm of the kidney	HP:0009726	C1378703
38	Cancer	Thyroid cancer	Neoplasm of the thyroid gland	HP:0100031	C0040136	Thyroid carcinoma	HP:0002896	C3501843	0.85	cancer	HP:0002664	C4732738		Thyroid cancer	HP:0002890	C0549473		Thyroid Neoplasm, Thyroid carcinoma, Malignant neoplasm of thyroid	C0040136	2	C0346650	6	Thyroid cancer	HP:0002896	C0345904
39	Cancer	Melanoma of skin	Melanoma	HP:0002861	C0025202	Cutaneous melanoma	HP:0012056	C0151779	1	Melanoma	HP:0002861	C0025202		Melanoma of skin	HP:0002861	C0025202		Cutaneous Melanoma	C0151779		C0025202	1	Melanoma	HP:0002861	C0025202
40	Cancer	Non-melanoma skin cancer	Non-melanoma skin carcinoma	HP:0012288	C0278996	Non-melanoma skin carcinoma	HP:0012288	C0278996	1	skin cancer	HP:0008069	C0037286		Non-melanoma skin cancer	HP:0008069	C0037286		Cutaneous Melanoma	C0151779		C0025203	3	Non-melanoma skin cancer
41	Cancer	Brain or spine cancer	Neoplasm of the central nervous system	HP:0100006	C0085136	Neoplasm of the central nervous system	HP:0100006	C0085136	0.9	spine cancer	HP:0010302	C0037930		Brain or spine cancer	HP:0030692	C0006118		Malignant neoplasm of spinal cord, Malignant neoplasm of vertebral column	C0153646	1	C0025204	3	Neoplasm of the central nervous system	HP:0004375	C0027766
42	Cancer	Blood cancer (including leukemia and lymphoma)	Neoplasm of the hematopoietic system	HP:0012126	C0024623	Neoplasm of the hematopoietic system	HP:0012126	C0024623	1	Blood cancer	HP:0001909	C0376545	2	Blood cancer, leukemia, lymphoma	HP:0001909	C0376545	2	Lymphoma, Hematologic Neoplasms, leukemia, Adult Lymphoma, Childhood Leukemia, Childhood Lymphoma, Liquid Tumor	C0024299	4	C0025205	4	Neoplasm	HP:0002664	C4732738
43	Head/Face/Neck	Chin differences	Abnormality of the chin	HP:0000306	C4025864	Abnormality of the chin	HP:0000306	C4025864	0.9												C0025206	3	Abnormality of the chin	HP:0000305
44	Head/Face/Neck	Cleft lip and/or cleft palate	Oral cleft	HP:0000202	C0158646	Orofacial cleft	HP:0000202	C0158646	0.9	Cleft lip	HP:0410030	C4321245	1	Cleft lip, cleft palate	HP:0410030	C4321245	1			1	C0025207		Orofacial cleft	HP:0000202	C0158646
45	Head/Face/Neck	General face shape differences	Abnormal facial shape	HP:0001999	C0424503	Abnormal facial shape	HP:0001999	C0424503	0.9	Abnormal facial shape	HP:0001999	C0424503									C0025208	7	Abnormality of facial shape	HP:0001999	C0424503
46	Head/Face/Neck	Hair differences (sparse, unusual texture)	Abnormality of the hair	HP:0001595	C0157733	Abnormality of the hair	HP:0001595	C0157733	0.9												C0025209	5	Abnormality of hair	HP:0001595	C0157733
47	Head/Face/Neck	Inside of the mouth (teeth/gums/tongue) issues	Abnormality of the oral cavity	HP:0000163	C4025887	Abnormality of the oral cavity	HP:0000163	C4025887	0.9	mouth	HP:0000710	C1838320						Residue on Tongue	C4283818		C0025210	1	Abnormality of the oral cavity	HP:0000153	C0026633
48	Head/Face/Neck	Lips or outside of the mouth issues	Abnormality of the mouth	HP:0000153	C0026633	Abnormality of the mouth	HP:0000153	C0026633	1	mouth issues	HP:0000153	C0026633									C0025211	1	Abnormality of the lips	HP:0000159	C2183966
49	Head/Face/Neck	Neck differences (short, broad, webbed, branchial anomalies)	Abnormality of the neck	HP:0000464	C0266623	Abnormality of the neck	HP:0000464	C0266623	0.7	branchial anomalies	HP:0009794	C1862066		branchial anomalies	HP:0009794	C1862066		Short Heart Murmur, chest pain radiating to neck	C2073348	1	C0025212	1	Abnormality of the neck	HP:0000464	C0266623
50	Head/Face/Neck	Nose differences	Abnormality of the nose	HP:0000366	C0265736	Abnormality of the nose	HP:0000366	C0265736	0.9												C0025213	3	Abnormality of the nose	HP:0000366	C0265736
51	Head/Face/Neck	Skull differences (macro/microcephaly, craniosynostosis)	Abnormality of the skull	HP:0000929	C0235942	Abnormal skull morphology	HP:0000929	C0235942	0.9	microcephaly	HP:0000252	C4551563	1	craniosynostosis	HP:0001363	C0010278		Craniosynostosis, Microcephaly (physical finding)	C0010278	1	C0025214	1	Abnormality of the skull	HP:0000929	C0235942
52	Head/Face/Neck	Throat/swallowing difficulties	Oral pharyngeal dysphagia	HP:0200136	C0267071	Dysphagia	HP:0002015	C0011168	0.9	Dysphagia	HP:0002015	C0011168		swallowing difficulties	HP:0002015	C0011168		Has difficulty doing (qualifier value)	C1299586		C0025215	3	Dysphagia	HP:0002015	C0011168
53	Eyes/Vision	Eye movement issues (strabismus, nystagmus)	Abnormality of eye movement	HP:0000496	C0497202	Abnormality of eye movement	HP:0000496	C0497202	0.9	Abnormality of eye movement	HP:0000496	C0497202	2	Eye movement issues, strabismus, nystagmus	HP:0000496	C0497202	2	Strabismus, Eye movement observation, Nystagmus, Nystagmus, CTCAE 3.0, Nystagmus, CTCAE 5.0	C4554036	4	C0025216	4	Abnormality of eye movement	HP:0000496	C0497202
54	Eyes/Vision	Difference in eye size (microphthalmia/anophthalmia)	Abnormality of globe size	HP:0100887	C4021945	Abnormality of globe size	HP:0100887	C4021945	0.9	Abnormality of globe size	HP:0100887	C4021945	2	Difference in eye size, microphthalmia/anophthalmia	HP:0100887	C4021945	1			1	C0025217	3	Microphthalmia	HP:0000568	C4280808
55	Eyes/Vision	Unusual iris (spots, heterochromia)	Abnormality of the iris	HP:0000525	C4025845	Abnormality of the iris	HP:0000525	C4025845	0.9	Abnormality of the iris	HP:0000525	C4025845						Exanthema, Spots on skin	C0015230	1	C0025218	3	Heterochromia iridis	HP:0001100	C0423318
56	Eyes/Vision	Lens issue (cataract, ectopia lentis)	Abnormality of the lens	HP:0000517	C0549651	Abnormality of the lens	HP:0000517	C0549651	0.9	Abnormality of the lens	HP:0000517	C0549651	2	Lens issue, cataract, ectopia lentis	HP:0000517	C0549651	2	Cataract, Abnormality of the lens, Cataract, CTCAE 5.0	C0549651	2	C0025219	4	Abnormality of the lens	HP:0000517	C0549651
57	Eyes/Vision	Major vision issues (blindness, color/night vision, photophobia)	Abnormality of vision	HP:0000504	C4025846	Abnormality of vision	HP:0000504	C4025846	0.7	Abnormality of vision	HP:0000504	C4025846	2	vision issues, blindness, photophobia	HP:0000504	C4025846	2	Color blindness, Photophobia, Photophobia, CTCAE 5.0, Severe (severity modifier)	C0242225	3	C0025220	3	Abnormality of vision	HP:0000504	C4025846
58	Eyes/Vision	Farsightedness (hyperopia)	Hypermetropia	HP:0000540	C0020490	Hyperopia	HP:0000540	C0020490	1	Hypermetropia	HP:0000540	C0020490	1	Farsightedness, hyperopia	HP:0000540	C0020490	1	Hyperopia	C0020490		C0020490	3	Hypermetropia	HP:0000540	C0020490
59	Eyes/Vision	Nearsightedness (myopia)	Myopia	HP:0000545	C0027092	Myopia	HP:0000545	C0027092	1	Myopia	HP:0000545	C0027092		Nearsightedness, myopia	HP:0000545	C0027092	1	Myopia	C0027092		C0027092	1	Myopia	HP:0000545	C0027092
60	Eyes/Vision	Optic nerve issues	Abnormality of the optic nerve	HP:0000587	C0029131	Abnormality of the optic nerve	HP:0000587	C0029131	0.9	Abnormality of the optic nerve	HP:0000587	C0029131		Optic nerve issues	HP:0000587	C0029131					C0027093	1	Abnormality of the optic nerve	HP:0000539	C4025843
61	Eyes/Vision	Retina issues (incl. macula)	Abnormality of the retina	HP:0000479	C0035300	Abnormality of the retina	HP:0000479	C0035300	0.9	Abnormality of the retina	HP:0000479	C0035300		Retina issues	HP:0000479	C0035300		Infantile neuronal ceroid lipofuscinosis	C0268281		C0027094	1	Abnormality of the retina	HP:0000479	C0035300
62	Eyes/Vision	Ptosis (drooping upper eyelid)	Ptosis	HP:0000508	C0005745	Ptosis	HP:0000508	C0005745	0.7	Ptosis	HP:0000508	C0005745	1	Ptosis, drooping upper eyelid	HP:0000508	C0005745	1	Blepharoptosis, Ptosis	C0005745	1	C0005745	1	Ptosis	HP:0000508	C0005745
63	Eyes/Vision	Coloboma (notched pupil)	Coloboma	HP:0000589	C0009363	Coloboma	HP:0000589	C0009363	0.9	Coloboma	HP:0000589	C0009363	1	Coloboma, notched pupil	HP:0000589	C0009363	1				C0009363		Iris coloboma	HP:0000612	C0240063
64	Ears/Hearing	Ear shape difference (over/under-developed, cupped, large)	Abnormality of the external ear	HP:0000356	C1846460	Abnormality of the external ear	HP:0000356	C1846460	0.9												C0009364		Abnormality of the pinna	HP:0000429	C4021804
65	Ears/Hearing	Conductive hearing loss	Conductive hearing impairment	HP:0000405	C0018777	Conductive hearing impairment	HP:0000405	C0018777	1					Conductive hearing loss	HP:0000405	C0018777		Conductive hearing loss	C0018777		C0018777	4	Conductive hearing impairment	HP:0000405	C0018777
66	Ears/Hearing	Sensorineural hearing loss (SNHL)	Sensorineural hearing impairment	HP:0000407	C0018784	Sensorineural hearing impairment	HP:0000407	C0018784	1	Sensorineural hearing impairment	HP:0000407	C0018784		Sensorineural hearing loss	HP:0000407	C0018784		Sensorineural Hearing Loss (disorder)	C0018784		C0018784	4	Sensorineural hearing impairment	HP:0000407	C0018784
67	Ears/Hearing	Mixed hearing loss	Mixed hearing impairment	HP:0000410	C0155552	Mixed hearing impairment	HP:0000410	C0155552	0.9	Mixed hearing impairment	HP:0000410	C0155552		Mixed hearing loss	HP:0000410	C0155552		Hearing Loss, Mixed Conductive-Sensorineural	C0155552		C0155552	2	Mixed hearing impairment	HP:0000406
68	Ears/Hearing	Hearing loss, unsure which type	Hearing impairment	HP:0000365	C0011053	Hearing impairment	HP:0000365	C0011053	1	Hearing impairment	HP:0000365	C0011053		Hearing loss	HP:0000365	C0011053		Uncertainty	C0087130		C0155553	2	Hearing impairment	HP:0000365	C0011053
69	Ears/Hearing	Ringing in the ears (tinnitus)	Tinnitus	HP:0000360	C0040264	Tinnitus	HP:0000360	C0040264	1	Tinnitus	HP:0000360	C0040264	1	Ringing in the ears, tinnitus	HP:0000360	C0040264	1	Tinnitus, Tinnitus, CTCAE 3.0, Tinnitus, CTCAE 5.0	C0040264	2	C0040264		Tinnitus	HP:0000360	C0040264
70	Ears/Hearing	Hyperacusis (sound hypersensitivity)	Hyperacusis	HP:0010780	C0034880	Hyperacusis	HP:0010780	C0034880	1	Hyperacusis	HP:0010780	C0034880	1	Hyperacusis	HP:0010780	C0034880		Hyperacusis, Hypersensitivity, Emotional hypersensitivity	C0034880	2	C0034880		Hyperacusis	HP:0010780	C0034880
71	Ears/Hearing	Dizziness (vertigo)	Vertigo	HP:0002321	C0012833	Dizziness	HP:0002321	C0012833	0.85	Vertigo	HP:0002321	C0012833	1	Dizziness, vertigo	HP:0002321	C0012833	1	Vertigo, Dizziness, Dizziness, CTCAE 3.0, Dizziness, CTCAE 5.0, Vertigo, CTCAE	C0012833	4	C0012833	7	Vertigo	HP:0002321	C0012833
72	Brain/Nervous System	Brain and/or spinal cord issue (MRI structural issues)	Abnormality of the central nervous system	HP:0002011	C4021765	Abnormality of the central nervous system	HP:0002011	C4021765	0.9	Brain and/or spinal cord issue	HP:0000707	C0497552		Brain and/or spinal cord issue	HP:0000707	C0497552		Brain and/or spinal cord issue	C4531023		C0012834	6	Abnormality of the central nervous system	HP:0002011	C4021765
73	Brain/Nervous System	Cerebral palsy (CP)	Cerebral palsy	HP:0100021	C0007789	Cerebral palsy	HP:0100021	C0007789	1	Cerebral palsy	HP:0100021	C0007789	1	Cerebral palsy, CP	HP:0100021	C0007789	1	Cerebral Palsy	C0007789		C0007789	1	Cerebral palsy	HP:0100021	C0007789
74	Brain/Nervous System	Cognitive impairment	Cognitive impairment	HP:0100543	C0683322	Cognitive impairment	HP:0100543	C0683322	1	Cognitive impairment	HP:0100543	C0683322		Cognitive impairment	HP:0100543	C0683322		Impaired cognition	C0338656		C0007790		Cognitive impairment	HP:0100543	C0683322
75	Brain/Nervous System	Coordination issues (clumsiness, movement)	Abnormality of coordination	HP:0011443	C4023353	Abnormality of coordination	HP:0011443	C4023353	0.9	Abnormality of coordination	HP:0011443	C4023353	1	Coordination issues, clumsiness	HP:0011443	C4023353	1	Clumsiness	C0233844		C0007791		Ataxia	HP:0001251	C0007758
76	Brain/Nervous System	EEG abnormality	EEG abnormality	HP:0002353	C0151611	Abnormal EEG	HP:0002353	C0151611	1	EEG abnormality	HP:0002353	C0151611		EEG abnormality	HP:0002353	C0151611		Electroencephalogram abnormal	C0151611		C0151611	2	EEG abnormality	HP:0002353	C0151611
77	Brain/Nervous System	Encephalopathy	Encephalopathy	HP:0001298	C0085584	Encephalopathy	HP:0001298	C0085584	0.7	Encephalopathy	HP:0001298	C0085584		Encephalopathy	HP:0001298	C0085584		Encephalopathies, Encephalopathy, CTCAE 3.0, Encephalopathy, CTCAE 5.0	C0085584	2	C0085584		Encephalopathy	HP:0001298	C0085584
78	Brain/Nervous System	Hypertonia (increased muscle tone)	Hypertonia	HP:0001276	C0026826	Hypertonia	HP:0001276	C0026826	1	Hypertonia	HP:0001276	C0026826	1	Hypertonia, increased muscle tone	HP:0001276	C0026826	1	Muscle Hypertonia, Observation of tone of skeletal muscle	C0026826	1	C0026826		Hypertonia	HP:0001276	C0026826
79	Brain/Nervous System	Hypotonia (low muscle tone, 'floppy')	Hypotonia	HP:0001290	C1858120	Generalised hypotonia	HP:0001290	C1858120	0.9	Hypotonia	HP:0001252	C1842364	1	Hypotonia, low muscle tone	HP:0001290	C1858120	1	Muscle hypotonia, Generalized hypotonia, floppy	C1858120	2	C0026827	3	Hypotonia	HP:0001252	C1842364
80	Brain/Nervous System	Memory impairment	Memory impairment	HP:0002354	C0542476	Memory impairment	HP:0002354	C0542476	1	Memory impairment	HP:0002354	C0542476		Memory impairment	HP:0002354	C0542476		Forgetful, Memory Impairment, CTCAE 3.0, Memory Impairment, CTCAE 5.0, Memory impairment	C0542476	3	C0026828		Impaired memory	HP:0002354	C0542476
81	Brain/Nervous System	Unusual movements (NOT Parkinson's disease)	Abnormality of movement	HP:0100022	C0026650	Abnormality of movement	HP:0100022	C0026650	0.9	Abnormality of movement	HP:0100022	C0026650		Unusual movements, Parkinson's disease	HP:0100022	C0026650	1	Parkinson Disease, Movement Disorders	C0026650	1	C0026829	4	Abnormality of movement	HP:0100022	C0026650
82	Brain/Nervous System	Parkinsonism	Parkinsonism	HP:0001300	C0242422	Parkinsonism	HP:0001300	C0242422	1	Parkinsonism	HP:0001300	C0242422		Parkinsonism	HP:0001300	C0242422		Parkinsonian Disorders	C0242422		C0242422	5	Parkinsonism	HP:0001300	C0242422
83	Brain/Nervous System	Seizures	Seizures	HP:0001250	C0014544	Seizure	HP:0001250	C0014544	1	Seizures	HP:0001250	C0014544		Seizures	HP:0001250	C0014544		Seizures	C0036572		C0242423		Seizure	HP:0001250	C0014544
84	Behavior/Psychiatric	Autism spectrum disorder (ASD)	Autism Spectrum Disorder	HP:0000729	C0856975	Autism spectrum disorder	HP:0000729	C0856975	1	Autism Spectrum Disorder	HP:0000729	C0856975	1	Autism spectrum disorder, ASD	HP:0000729	C0856975	1	Autism Spectrum Disorders, Autistic behavior, Pervasive Development Disorder	C0856975	2	C0242424	1	Autism	HP:0000717	C0004352
85	Behavior/Psychiatric	Bipolar disorder (manic depression)	Bipolar affective disorder	HP:0007302	C0005586	Bipolar disorder	HP:0007302	C0005586	0.9	Bipolar affective disorder	HP:0007302	C0005586	1	Bipolar disorder, manic depression	HP:0007302	C0005586	1	Bipolar Disorder, Manic Depression	C0005586	1	C0005586	3	Bipolar affective disorder	HP:0007302	C0005586
86	Behavior/Psychiatric	Schizophrenia	Schizophrenia	HP:0100753	C0036341	Schizophrenia	HP:0100753	C0036341	1	Schizophrenia	HP:0100753	C0036341		Schizophrenia	HP:0100753	C0036341		Schizophrenia	C0036341		C0036341	6	Schizophrenia	HP:0100753	C0036341
87	Behavior/Psychiatric	Repetitive or self-injurious behavior	Stereotypic behavior	HP:0000733	C0038271	Repetitive, stereotypic behavior	HP:0000733	C0038271	1	self-injurious behavior	HP:0100716	C0085271		self-injurious behavior	HP:0100716	C0085271					C0036342	6	Stereotypic behavior	HP:0000733	C0038271
88	Behavior/Psychiatric	Aggressive/violent behavior	Aggressive/violent behavior	HP:0006919	C4024963	Aggressive behavior	HP:0000718	C0001807	0.85	Aggressive/violent	HP:0006919	C4024963		Aggressive/violent behavior	HP:0006919	C4024963					C0036343	1	Aggressive behavior	HP:0000718	C0001807
89	Behavior/Psychiatric	Anxiety	Anxiety	HP:0000739	C0003467	Anxiety	HP:0000739	C0003467	1	Anxiety	HP:0000739	C0003467		Anxiety	HP:0000739	C0003467		Anxiety, Anxiety Disorders, Anxiety, CTCAE 5.0	C0003467	2	C0003467	5	Anxiety	HP:0000739	C0003467
90	Behavior/Psychiatric	Depression	Depression	HP:0000716	C0011581	Depression	HP:0000716	C0011581	1	Depression	HP:0000716	C0011581		Depression	HP:0000716	C0011581		Depressive disorder, Depressed mood, Mental Depression	C0011581	2	C0011581	4	Depression	HP:0000716	C0011581
91	Behavior/Psychiatric	Delusions	Delusions	HP:0000746	C0011253	Delusions	HP:0000746	C0011253	1	Delusions	HP:0000746	C0011253		Delusions	HP:0000746	C0011253		Delusions, Delusions, CTCAE	C0011253	1	C0011253		Delusions	HP:0000746	C0011253
92	Behavior/Psychiatric	Hallucinations	Hallucinations	HP:0000738	C0018524	Hallucinations	HP:0000738	C0018524	1	Hallucinations	HP:0000738	C0018524		Hallucinations	HP:0000738	C0018524					C0018524		Hallucinations	HP:0000738	C0018524
93	Behavior/Psychiatric	Obsessive compulsive disorder (OCD)	Obsessive compulsive disorder	HP:0000722	C0600104	Obsessive-compulsive disorder	HP:0000722	C0600104	1	Obsessive compulsive disorder	HP:0000722	C0600104		Obsessive compulsive disorder, OCD	HP:0000722	C0600104	1	Obsessive-Compulsive Disorder, Obsessive compulsive disorder drugs	C0028768		C0018525	1	Obsessive-compulsive disorder	HP:0000722	C0600104
94	Behavior/Psychiatric	Psychosis	Psychosis	HP:0000709	C0033975	Psychosis	HP:0000709	C0033975	1	Psychosis	HP:0000709	C0033975		Psychosis	HP:0000709	C0033975		Psychotic Disorders, Psychosis, CTCAE	C0033975	1	C0033975		Psychosis	HP:0000709	C0033975
95	Behavior/Psychiatric	Short attention span (incl. ADD/ADHD)	Short attention span	HP:0000736	C0262630	Short attention span	HP:0000736	C0262630	0.7	Short attention span	HP:0000736	C0262630		Short attention span	HP:0000736	C0262630		Infantile neuronal ceroid lipofuscinosis, Attention deficit hyperactivity disorder, Add, Reduced concentration span	C0262630	3	C0262630		Attention deficit hyperactivity disorder	HP:0007018	C1263846
96	Skin	Atrophic scars	Atrophic scarring	HP:0001075	C0162154	Atrophic scars	HP:0001075	C0162154	1	Atrophic scarring	HP:0001075	C0162154		Atrophic scars	HP:0001075	C0162154		Atrophic scar	C0162154		C0162154	2	Atrophic scarring	HP:0001075	C0162154
97	Skin	Café-au-lait spots	Cafe-au-lait spots	HP:0000957	C0265974	Cafe-au-lait spots	HP:0000957	C0265974	1	Cafe-au-lait spots	HP:0000957	C0265974									C0162155	1	Cafe-au-lait spot	HP:0000957	C0265974
98	Skin	Hyperpigmentation	Hyperpigmentation	HP:0000953	C0162834	Hyperpigmentation of the skin	HP:0000953	C0162834	0.9									Hyperpigmentation, Hyperpigmentation, CTCAE 3	C0162834		C0162834	1	Hyperpigmentation of the skin	HP:0000953	C0162834
99	Skin	Hypopigmentation	Hypopigmentation	HP:0001010	C0162835	Hypopigmentation of the skin	HP:0001010	C0162835	0.9	Hypopigmentation	HP:0001010	C0162835		Hypopigmentation	HP:0001010	C0162835		ALBINOIDISM, OCULOCUTANEOUS, AUTOSOMAL DOMINANT, Hypopigmentation disorder, Hypopigmentation, CTCAE 3	C0162835	2	C0162835	5	Hypopigmentation of the skin	HP:0001010	C0162835
100	Skin	Decreased sweating (hypohidrosis)	Hypohidrosis	HP:0000966	C0553721	Hypohidrosis	HP:0000966	C0553721	1	Hypohidrosis	HP:0000966	C0553721	1	Decreased sweating, hypohidrosis	HP:0000966	C0553721	1	Hypohidrosis, Diminished sweating, Hypohidrosis, CTCAE	C0553721	2	C0162836	4	Hypohidrosis	HP:0000966	C0553721
101	Skin	Increased sweating (hyperhidrosis)	Hyperhidrosis	HP:0000975	C0700590	Hyperhidrosis	HP:0000975	C0700590	1	Hyperhidrosis	HP:0000975	C0700590	1	Increased sweating, hyperhidrosis	HP:0000975	C0700590	1	Hyperhidrosis disorder, Hyperhidrosis, CTCAE	C0020458	1	C0700590	1	Hyperhidrosis	HP:0000975	C0700590
102	Skin	Skin fragility	Fragile skin	HP:0001030	C0241181	Skin fragility	HP:0001030	C0241181	1	Fragile skin	HP:0001030	C0241181		Skin fragility	HP:0001030	C0241181		Fragile skin	C0241181		C0241181		Skin fragility	HP:0001030	C0241181
103	Skin	Skin sensitivity to sunlight	Skin photosensitivity	HP:0000992	C0349506	Cutaneous photosensitivity	HP:0000992	C0349506	0.9	Skin photosensitivity	HP:0000992	C0349506						Photosensitivity of skin	C0349506		C0349506		Photosensitivity	HP:0000980	C0241137
104	Skin	Thick skin (keratoderma/hyperkeratosis)	Thick skin	HP:0001072	C4020878	Thick skin	HP:0001072	C4020878	0.9	Thick skin	HP:0001072	C4020878	1	Thick skin	HP:0001072	C4020878		Keratosis, Hyperkeratosis, Hyperkeratosis, CTCAE, Thick skin	C0022593	3	C0349507	3	Hyperkeratosis	HP:0000981
105	Skin	Hyperelastic skin	Hyperelastic skin	HP:0000974	C0241074	Skin hyperextensibility	HP:0000974	C0241074	0.9	Hyperelastic skin	HP:0000974	C0241074		Hyperelastic skin	HP:0000974	C0241074		Skin hyperelastic	C0241074		C0349508	4	Skin hyperextensibility	HP:0000974	C0241074
106	Skin	Hypoelastic or 'saggy' skin (cutis laxa)	Cutis laxa	HP:0000973	C0010495	Cutis laxa	HP:0000973	C0010495	1	Cutis laxa	HP:0000973	C0010495	1	Hypoelastic or 'saggy' skin, cutis laxa	HP:0000973	C0010495	1	Cutis Laxa	C0010495		C0010495	1	Cutis laxa	HP:0001050	C0232370
107	Bone/Cartilage/Connective Tissue	Arm and/or leg bone differences since birth	Abnormality of limb bone morphology	HP:0002813	C4082761	Abnormality of limb bone morphology	HP:0002813	C4082761	0.9	Abnormality of limb bone morphology	HP:0002813	C4082761		Arm and/or leg bone differences	HP:0002813	C4082761		Abnormality of limb bone morphology	C4082761		C0010496	2	Limb malformation	HP:0033127	C3825027
108	Bone/Cartilage/Connective Tissue	Curvature of the spine (scoliosis/kyphosis)	Abnormal curvature of the spine	HP:0010674	C4023747	Abnormal curvature of the vertebral column	HP:0010674	C4023747	0.9	Abnormal curvature of the spine	HP:0010674	C4023747	2	Curvature of the spine	HP:0002650	C5937607		Scoliosis Kyphosis	C4230850		C0010497		Abnormality of the curvature of the vertebral column	HP:0002656	C4280566
109	Bone/Cartilage/Connective Tissue	Flexible joints (hypermobile)	Joint hyperextensibility	HP:0001382	C1862377	Joint hypermobility	HP:0001382	C1862377	1	Joint hyperextensibility	HP:0001382	C1862377		Flexible joints	HP:0001382	C1862377		Range of joint movement increased	C1844820		C0010498	3	Joint hypermobility	HP:0001388	C0086437
110	Bone/Cartilage/Connective Tissue	Frequent broken bones (brittle bones)	Increased susceptibility to fractures	HP:0002659	C1390474	Bone fragility	HP:0002659	C1390474	0.9	Increased susceptibility to fractures	HP:0002659	C1390474		Frequent broken bones	HP:0002659	C1390474		Osteogenesis Imperfecta, Increased susceptibility to fractures	C1390474	1	C0010499	1	Recurrent fractures	HP:0005518	C0302845
111	Bone/Cartilage/Connective Tissue	Finger and/or toe differences (extra/missing/fused)	Abnormality of the digits	HP:0011297	C3550704	Abnormal digit morphology	HP:0011297	C3550704	0.9	Abnormality of the digits	HP:0011297	C3550704		toe differences	HP:0001780	C2674738					C0010500	5	Abnormality of the digits	HP:0010674	C4023747
112	Bone/Cartilage/Connective Tissue	Hand differences (split hand, extra/missing bones)	Abnormality of the hand	HP:0001155	C0018564	Abnormality of the hand	HP:0001155	C0018564	0.9	split hand	HP:0001171	C2699510		Hand differences, split hand	HP:0001155	C0018564	1	Container status - Missing, Missing Study Animal	C1551393	1	C0010501		Abnormality of the hand	HP:0001155	C0018564
113	Bone/Cartilage/Connective Tissue	Foot differences (split foot, extra/missing bones)	Abnormality of the foot	HP:0001760	C5399834	Abnormality of the foot	HP:0001760	C5399834	0.7	split foot	HP:0001839	C0432028		split foot	HP:0001839	C0432028		Container status - Missing, Missing Study Animal	C1551393	1	C0010502	3	Cleft foot	HP:0001839	C0432028
114	Bone/Cartilage/Connective Tissue	Hip dysplasia	Hip dysplasia	HP:0001385	C4732734	Congenital hip dysplasia	HP:0001385	C4732734	0.9	Hip dysplasia	HP:0001385	C4732734		Hip dysplasia	HP:0001385	C4732734		Hip Dysplasia	C1328407		C0010503	1	Hip dysplasia	HP:0001385	C4732734
115	Bone/Cartilage/Connective Tissue	Pectus carinatum ('pigeon chest')	Pectus carinatum	HP:0000768	C0158731	Pectus carinatum	HP:0000768	C0158731	1	Pectus carinatum	HP:0000768	C0158731		Pectus carinatum, pigeon chest	HP:0000768	C0158731	1	Pectus carinatum	C2939416		C0158731		Pectus carinatum	HP:0000768	C0158731
116	Bone/Cartilage/Connective Tissue	Pectus excavatum ('funnel chest')	Pectus excavatum	HP:0000767	C2051831	Pectus excavatum	HP:0000767	C2051831	1	Pectus excavatum	HP:0000767	C2051831		Pectus excavatum, funnel chest	HP:0000767	C2051831	1	Pectus excavatum	C2051831		C0158732		Pectus excavatum	HP:0000767	C2051831
117	Bone/Cartilage/Connective Tissue	Skeletal dysplasia (incl. some forms of dwarfism)	Skeletal dysplasia	HP:0002652	C4280567	Skeletal dysplasia	HP:0002652	C4280567	0.7	Skeletal dysplasia	HP:0002652	C4280567	1	Skeletal dysplasia, dwarfism	HP:0002652	C4280567	1	Infantile neuronal ceroid lipofuscinosis, Osteochondrodysplasias	C0268281	1	C0158733	1	Abnormality of the skeletal system	HP:0000924	C4021790
118	Muscles	Facial muscle issue (palsy, chewing, eye movement)	Abnormality of facial musculature	HP:0000301	C4025865	Facial muscle issue	HP:0000301	C4025865	0.7	Abnormality of facial musculature	HP:0000301	C4025865		Facial muscle issue	HP:0000301	C4025865		Palsy, Abnormality of facial musculature, Eye movement observation, Paralysed	C4025865	3	C0158734		Facial palsy	HP:0010623
119	Muscles	Issue with muscle function	Abnormality of muscle physiology	HP:0011804	C4023182	Abnormality of muscle physiology	HP:0011804	C4023182	0.9	Abnormality of muscle physiology	HP:0011804	C4023182						Abnormal muscle physiology	C4023182		C0158735	2	Abnormality of the musculature	HP:0003011	C4021745
120	Muscles	Issue with internal muscle structure (biopsy)	Abnormality of muscle morphology	HP:0011805	C4023181	Abnormal muscle morphology	HP:0011805	C4023181	0.9									Problem, biopsy characteristics	C0033213	2	C0158736		Abnormal muscle biopsy	HP:0003201	C0035410
121	Muscles	Issue with nerves connected to muscles (EMG/NCS)	Abnormality of the somatic nervous system	HP:0410009	C4073188	Peripheral neuropathy	HP:0009830	C0442874	0.7									Problem	C0033213		C0158737	1	Abnormality of the electromyogram	HP:0003450	C1854454
122	Muscles	Muscle issues in the arms and/or legs (weakness/underdevelopment)	Abnormality of the musculature of the limbs	HP:0009127	C4024582	Abnormality of the musculature of the limbs	HP:0009127	C4024582	0.9	Abnormality of the musculature of the limbs	HP:0009127	C4024582	1					Asthenia, Abnormality of the musculature of the limbs, Weakness	C4024582	2	C0158738	6	Muscle weakness	HP:0001324	C0151786
123	Muscles	Muscle issues in the chest, back, and/or shoulders	Abnormality of the musculature of the thorax	HP:0009131	C4024580	Abnormality of the musculature of the thorax	HP:0009131	C4024580	1	Muscle issues in the chest	HP:0410167	C4703654		Muscle issues in the chest	HP:0410167	C4703654		Heart Sound Auscultation at Back, Muscle issues in the chest, chest pain radiating to back	C5238720	2	C0158739	1	Myalgia	HP:0003326	C0231528
124	Muscles	Neck muscle issue (torticollis or neck weakness)	Abnormality of the musculature of the neck	HP:0011006	C4023601	Abnormality of the musculature of the neck	HP:0011006	C4023601	1	Abnormality of the musculature of the neck	HP:0011006	C4023601	2	Neck muscle issue, torticollis, neck weakness	HP:0011006,		2	Torticollis, Abnormal morphology of the musculature of the neck, Weakness of neck	C4023601	2	C0158740	5	Torticollis	HP:0000473	C0152116
125	Heart/Blood Vessels	Aneurysm	Aneurysm	HP:0002617	C0002940	Aneurysm	HP:0002617	C0002940	1	Aneurysm	HP:0002617	C0002940		Aneurysm	HP:0002617	C0002940					C0002940	5	Aneurysm	HP:0002617	C0002940
126	Heart/Blood Vessels	Arrhythmia (irregular/fast/slow heart rhythm)	Cardiac arrhythmia	HP:0011675	C1744601	Arrhythmia	HP:0011675	C1744601	0.9	Cardiac arrhythmia	HP:0011675	C1744601	1	Arrhythmia, irregular/fast/slow heart rhythm	HP:0011675	C1744601	2	Fasting, Cardiac Arrhythmia, Family History of Arrhythmia, Fasting Status Indicator	C0015663	3	C0002941	2	Arrhythmia	HP:0011675	C1744601
127	Heart/Blood Vessels	Abnormal EKG (ECG)	Abnormal EKG	HP:0003115	C0522055	Abnormal electrocardiogram	HP:0003115	C0522055	1	Abnormal EKG	HP:0003115	C0522055		Abnormal EKG	HP:0003115	C0522055		Electrocardiogram abnormal (finding), Electrocardiogram finding	C0522055	1	C0522055	4	Abnormality of the electrocardiogram	HP:0003114	C4020686
128	Heart/Blood Vessels	Arterial dissection	Arterial dissection	HP:0005294	C0002949	Arterial dissection	HP:0005294	C0002949	1	Arterial dissection	HP:0005294	C0002949		Arterial dissection	HP:0005294	C0002949		Aneurysm, Dissecting	C0002949		C0002949	4	Arterial dissection	HP:0002647	C0340643
129	Heart/Blood Vessels	Cardiomyopathy	Cardiomyopathy	HP:0001638	C0878544	Cardiomyopathy	HP:0001638	C0878544	1	Cardiomyopathy	HP:0001638	C0878544		Cardiomyopathy	HP:0001638	C0878544		Cardiomyopathies, Family history: Cardiomyopathy (situation)	C0878544	1	C0878544	6	Cardiomyopathy	HP:0001638	C0878544
130	Heart/Blood Vessels	Fainting (syncope)	Syncope	HP:0001254	C0541911	Syncope	HP:0001254	C0541911	1	Fainting	HP:0007185	C0039070	1	syncope	HP:0001279	C0039070		Syncope, Family history of syncope, Syncope, CTCAE 5.0	C0039070	2	C0878545	2	Syncope	HP:0001279	C0039070
131	Heart/Blood Vessels	Heart defect (congenital)	Congenital heart defect	HP:0001627	C0018798	Congenital heart defect	HP:0001627	C0018798	1	Congenital heart defect	HP:0001627	C0018798		Heart defect	HP:0030680	C4049796					C0018798	5	Congenital heart disease	HP:0001627	C0018798
132	Heart/Blood Vessels	High blood pressure (hypertension)	Hypertension	HP:0000822	C0020538	Arterial hypertension	HP:0000822	C0020538	0.9	Hypertension	HP:0000822	C0020538	1	High blood pressure, hypertension	HP:0000822	C0020538	1	Hypertensive disease, Family history: Hypertension, Hypertension, CTCAE	C0020538	2	C0020538		Hypertension	HP:0000822	C0020538
133	Heart/Blood Vessels	High cholesterol (hypercholesterolemia)	Hypercholesterolemia	HP:0003124	C0595929	Hypercholesterolemia	HP:0003124	C0595929	1	Hypercholesterolemia	HP:0003124	C0595929	1	High cholesterol, hypercholesterolemia	HP:0003124	C0595929	1	Hypercholesterolemia, Hypercholesterolemia result	C0020443	1	C0020539		Hypercholesterolemia	HP:0003124	C0595929
134	Heart/Blood Vessels	Stroke	Stroke	HP:0001297	C0038454	Cerebral vascular abnormality	HP:0001297	C0038454	1	Stroke	HP:0001297	C0038454		Stroke	HP:0001297	C0038454					C0038454	1	Stroke	HP:0001297	C0038454
135	Lungs/Breathing	Asthma	Asthma	HP:0002099	C0004096	Asthma	HP:0002099	C0004096	1	Asthma	HP:0002099	C0004096		Asthma	HP:0002099	C0004096					C0004096	4	Asthma	HP:0002099	C0004096
136	Lungs/Breathing	Chronic lung issues (exclude acute infections)	Chronic lung disease	HP:0006528	C0746102	Chronic lung disease	HP:0006528	C0746102	0.9	Chronic lung disease	HP:0006528	C0746102		Chronic lung, lung issues	HP:0006528	C0746102	1	Acute infectious disease, Chronic graft-versus-host disease	C0275518	1	C0004097	1	Abnormality of the lung	HP:0002088	C4021760
137	Lungs/Breathing	Decreased lung function	Decreased pulmonary function	HP:0005952	C0235063	Impaired pulmonary function	HP:0002795	C1260922	0.7	Decreased lung	HP:0002089	C0265783		Decreased lung function	HP:0005952	C0235063					C0235063	3	Abnormality of pulmonary function tests	HP:0002878	C1145670
138	Lungs/Breathing	Diaphragm issues (hernia/weakness)	Abnormality of the diaphragm	HP:0000775	C1848873	Abnormality of the diaphragm	HP:0000775	C1848873	0.9	Abnormality of the diaphragm	HP:0000775	C1848873	1	Diaphragm issues	HP:0000775	C1848873		Asthenia, Abnormality of the diaphragm, Weakness	C1848873	2	C0235064	1	Diaphragmatic hernia	HP:0000776	C0235833
139	Lungs/Breathing	Respiratory insufficiency	Respiratory insufficiency	HP:0002093	C4020855	Respiratory insufficiency	HP:0002093	C4020855	1	Respiratory insufficiency	HP:0002093	C4020855		Respiratory insufficiency	HP:0002093	C4020855		Respiratory Failure, Respiratory Insufficiency	C1145670	1	C0235065	1	Respiratory insufficiency	HP:0002093	C4020855
140	Lungs/Breathing	Restrictive lung disease	Restrictive lung disease	HP:0002091	C3277226	Restrictive lung disease	HP:0002091	C3277226	1	Restrictive lung disease	HP:0002091	C3277226		Restrictive lung disease	HP:0002091	C3277226		Restrictive lung disease	C0085581		C0235066		Restrictive lung disease	HP:0002091	C3277226
141	Lungs/Breathing	Unusual breathing patterns (apnea/hyperventilation/tachypnea)	Abnormal pattern of respiration	HP:0002793	C1837388	Abnormal pattern of respiration	HP:0002793	C1837388	0.9	Abnormal pattern of respiration	HP:0002793	C1837388	3	Unusual breathing patterns, apnea/hyperventilation, tachypnea	HP:0002793	C1837388	1	Apnea, Hyperventilation, Tachypnea, Abnormal pattern of respiration, Apnea, CTCAE	C1837388	4	C0235067	2	Abnormal breathing	HP:0002795	C1260922
142	Lungs/Breathing	Upper respiratory tract issues (larynx/trachea/bronchi)	Abnormality of the upper respiratory tract	HP:0002087	C4025727	Abnormality of the upper respiratory tract	HP:0002087	C4025727	0.9	Abnormality of the upper respiratory tract	HP:0002087	C4025727		Upper respiratory tract issues	HP:0002087	C4025727		Abnormality of the upper respiratory tract	C4025727		C0235068	6	Abnormality of the respiratory system	HP:0002086	C4018871
143	Digestive System	Feeding difficulties	Feeding difficulties	HP:0011968	C0232466	Feeding difficulties	HP:0011968	C0232466	1	Feeding difficulties	HP:0011968	C0232466		Feeding difficulties	HP:0011968	C0232466		Has difficulty doing (qualifier value)	C1299586		C0232466		Feeding difficulties	HP:0011968	C0232466
144	Digestive System	Esophagus issues (reflux/inflammation/stricture)	Abnormality of the esophagus	HP:0002031	C0266126	Functional abnormality of the esophagus	HP:0025270	C4476684	0.9	Abnormality of the esophagus	HP:0002031	C0266126	1	Esophagus issues	HP:0002031	C0266126		Inflammation, Stenosis, Acid reflux, Reflux	C0021368	3	C0232467		Gastroesophageal reflux	HP:0002020	C4317146
145	Digestive System	Stomach issues (hernia/pyloric stenosis/delayed emptying)	Abnormality of the stomach	HP:0002577	C4025699	Abnormality of the stomach	HP:0002577	C4025699	0.85	Abnormality of the stomach	HP:0002577	C4025699	3	hernia, pyloric stenosis	HP:0100790	C0019270	1	Pyloric Stenosis, Hernia, Delayed Capillary Refill Time	C0034194	2	C0232468	1	Abnormality of the stomach	HP:0002577	C4025699
146	Digestive System	Pancreas issues (pancreatitis/cysts)	Abnormality of the pancreas	HP:0001732	C4025751	Abnormality of the pancreas	HP:0001732	C4025751	0.9	Abnormality of the pancreas	HP:0001732	C4025751	1	pancreatitis	HP:0001733	C0030305		Cyst, Pancreatitis, Pancreatitis, CTCAE 3.0, Pancreatitis, CTCAE 5.0	C0010709	3	C0232469	3	Abnormality of the pancreas	HP:0001738	C0267963
147	Digestive System	Liver issues (hepatomegaly/cirrhosis/hepatitis/cysts)	Abnormality of the liver	HP:0001392	C4021780	Abnormality of the liver	HP:0001392	C4021780	0.9	Abnormality of the liver	HP:0001392	C4021780	4					Hepatitis A, Hepatomegaly, Liver Cirrhosis, Cyst, Cirrhosis, Hepatitis	C0019159	5	C0232470	2	Abnormality of the liver	HP:0001392	C4021780
148	Digestive System	Dysmotility (ileus/intestinal pseudo-obstruction)	Gastrointestinal dysmotility	HP:0002579	C1836923	Gastrointestinal dysmotility	HP:0002579	C1836923	1	intestinal pseudo-obstruction	HP:0004389	C0021847		ileus, intestinal pseudo-obstruction	HP:0002595	C1258215	1	Intestinal Pseudo-Obstruction, Ileus, Dysmotility, Ileus, CTCAE, Intestinal obstruction co-occurrent and due to decreased peristalsis	C0021847	4	C0232471	2	Intestinal pseudo-obstruction	HP:0004383	C0344906
149	Digestive System	Intestines issues (malabsorption/malrotation/polyps/IBD)	Abnormality of the intestine	HP:0002242	C4316788	Abnormality of the intestine	HP:0002242	C4316788	0.9	Intestines issues	HP:0002242	C4316788	2					Malabsorption Syndrome, polyps, Malabsorption, Malabsorption, CTCAE	C0024523	3	C0232472	5	Abnormality of the intestine	HP:0002242	C4316788
150	Digestive System	Soiling/defecation problems	Abnormality of the large intestine	HP:0002250	C4025715	Abnormality of the large intestine	HP:0002250	C4025715	0.9	Soiling/defecation	HP:0040183	C2945606									C0232473	3	Fecal incontinence	HP:0002607	C0015732
151	Digestive System	Anus issues (anorectal malformation)	Abnormality of the anus	HP:0004378	C4025329	Abnormality of the anus	HP:0004378	C4025329	0.9	anorectal malformation	HP:0012732	C3495676						Anorectal Malformations	C3495676		C0232474	1	Abnormality of the anus	HP:0002020	C4317146
152	Kidney/Bladder/Genitals	Bladder issues (stones/size/overactive/incontinence)	Abnormality of the bladder	HP:0000014	C0149632	Abnormality of the bladder	HP:0000014	C0149632	0.9	Abnormality of the bladder	HP:0000014	C0149632						Incontinence	C0021167		C0232475	1	Abnormality of the urinary bladder	HP:0000015	C0156273
153	Kidney/Bladder/Genitals	Abnormal internal or external sex organ (DSD)	Abnormal sex determination	HP:0012244	C4022996	Abnormality of the genital system	HP:0000078	C0744356	0.9									Sex Differentiation Disorders, Abnormal	C2930619	1	C0232476	4	Abnormality of the genitourinary system	HP:0000119	C0042063
154	Kidney/Bladder/Genitals	Kidney function issue (failure/filtration/absorption)	Renal insufficiency	HP:0000083	C0035078	Renal insufficiency	HP:0000083	C0035078	0.9	Kidney function issue	HP:0012211	C0151746		Kidney function issue	HP:0012211	C0151746		Abnormal renal function	C0151746		C0232477	7	Renal insufficiency	HP:0000083	C0035078
155	Kidney/Bladder/Genitals	Kidney structure issue (size/missing/ectopia)	Kidney malformation	HP:0012210	C4551596	Kidney malformation	HP:0012210	C4551596	0.9	Kidney malformation	HP:0012210	C4551596						Ectopic Tissue, Abnormal renal morphology, Ectopic Tissue present	C4551596	2	C0232478	6	Abnormality of the kidney	HP:0000077	C0266292
156	Kidney/Bladder/Genitals	Female sex organ disorder (labia/vagina/uterus/ovaries)	Abnormality of FEMALE genitalia	HP:0010460	C4023820	Abnormality of the female genitalia	HP:0010460	C4023820	0.9									Disease	C0012634		C0232479	1	Abnormality of the genitourinary system	HP:0000119	C0042063
157	Kidney/Bladder/Genitals	Genitalia function (infertility/impotence/ovarian failure)	Genital functional abnormality	HP:0000080	C4020896	Abnormality of reproductive system physiology	HP:0000080	C4020896	0.9	infertility	HP:0000789	C0021359	2	infertility, impotence	HP:0000789	C0021359	1	Erectile dysfunction, Infertility, Ovarian failure	C0242350	2	C0232480	6	Infertility	HP:0000789	C0021359
158	Kidney/Bladder/Genitals	Male sex organ disorder (penis/scrotum/testes/prostate)	Abnormality of MALE genitalia	HP:0010461	C4023819	Abnormality of the male genitalia	HP:0010461	C4023819	0.9									Disease	C0012634		C0232481	4	Abnormality of the genital system	HP:0000768	C0158731
159	Kidney/Bladder/Genitals	Urethra issue (formation/blockage/hypospadias)	Abnormality of the urethra	HP:0000795	C4025826	Abnormality of the urethra	HP:0000795	C4025826	0.9	Abnormality of the urethra	HP:0000795	C4025826	1	Urethra issue	HP:0000795	C4025826		Abnormality of the urethra, Blockage (obstruction - finding), Blockage within Medical Device	C4025826	2	C0232482	2	Hypospadias	HP:0000047	C0848558
160	Kidney/Bladder/Genitals	Ureter issue (size/formation/blockage/missing)	Abnormality of the ureter	HP:0000069	C1840382	Abnormality of the ureter	HP:0000069	C1840382	0.9	Abnormality of the ureter	HP:0000069	C1840382		Ureter issue	HP:0000069	C1840382		Abnormality of the ureter, Blockage (obstruction - finding), Blockage within Medical Device	C1840382	2	C0232483		Abnormality of the ureter	HP:0000076	C0042580
161	Kidney/Bladder/Genitals	Urine issues (hematuria/proteinuria/color/odor)	Abnormality of the urine	HP:0003110	C4025655	Abnormality of urine homeostasis	HP:0003110	C4025655	0.7	Abnormality of the urine	HP:0003110	C4025655	2	Urine issues	HP:0003110	C4025655		Hematuria, Proteinuria, Abnormality of urine homeostasis, Hematuria, CTCAE, Proteinuria, CTCAE 3.0, Proteinuria, CTCAE 5.0	C4025655	5	C0232484	2	Abnormality of urinalysis	HP:0011030	C4023584
162	Immune System	Autoimmune disorder (e.g., Hashimoto, lupus, ITP)	Autoimmunity	HP:0002960	C0004364	Autoimmune disease	HP:0002960	C0004364	0.9	Autoimmunity	HP:0002960	C0004364		Autoimmune disorder	HP:0002960	C0004364		Immune thrombocytopenic purpura, Lupus Vulgaris, Lupus Erythematosus, Discoid, Autoimmune Diseases, Autoimmune Disorder, CTCAE, Lupus Erythematosus	C0004364	5	C0232485		Autoimmunity	HP:0002960	C0004364
163	Immune System	Immunodeficiency (T-cell/combined/other)	Immunodeficiency	HP:0002721	C0021051	Immunodeficiency	HP:0002721	C0021051	0.7	Immunodeficiency	HP:0002721	C0021051		Immunodeficiency	HP:0002721	C0021051		Immunologic Deficiency Syndromes	C0021051		C0232486		Immunodeficiency	HP:0002721	C0021051
164	Immune System	Increased inflammatory response	Increased inflammatory response	HP:0012647	C4022805	Increased inflammatory response	HP:0012649	C4022803	1	Increased inflammatory response	HP:0012649	C4022803		Increased inflammatory response	HP:0012649	C4022803		Inflammatory Response	C1155266		C0232487		Abnormality of the immune system	HP:0002715	C4021753
165	Immune System	Recurrent infections	Recurrent infections	HP:0002719	C0239998	Recurrent infections	HP:0002719	C0239998	1	Recurrent infections	HP:0002719	C0239998		Recurrent infections	HP:0002719	C0239998		Recurrent infections	C0239998		C0232488		Recurrent infections	HP:0002719	C0239998
166	Immune System	Rheumatoid arthritis (juvenile/adult)	Rheumatoid arthritis	HP:0001370	C0003873	Rheumatoid arthritis	HP:0001370	C0003873	0.85	Rheumatoid arthritis	HP:0001370	C0003873		Rheumatoid arthritis	HP:0001370	C0003873		Rheumatoid Arthritis	C0003873		C0003873		Rheumatoid arthritis	HP:0001370	C0003873
167	Blood/Bleeding	Blood clot (veins/arteries; thrombosis)	Abnormal thrombosis	HP:0001977	C4025731	Abnormal thrombosis	HP:0001977	C4025731	0.9	Abnormal thrombosis	HP:0001977	C4025731						Blood Clot, Thrombosis, Thrombus, Thrombosis of blood vessel	C0302148	3	C0003874		Thrombosis	HP:0001907	C0040038
168	Blood/Bleeding	Blood clotting disorder (too fast/too slow)	Abnormality of coagulation	HP:0001928	C1846821	Coagulopathy	HP:0003256	C0005779	0.9					Blood clotting disorder	HP:0001928	C1846821		Fasting, Blood Coagulation Disorders, Fasting Status Indicator	C0015663	2	C0003875		Abnormality of blood coagulation	HP:0001928	C1846821
169	Blood/Bleeding	Easy bleeding (with little/no trauma)	Bleeding with minor or no trauma	HP:0011889	C4023143	Bleeding tendency	HP:0001892	C1458140	0.9	Bleeding with minor or no trauma	HP:0011889	C4023143		Easy bleeding	HP:0011889	C4023143		Easy bleeding, Only a Little, Trauma, Traumatic injury, Wounds and Injuries	C2199604	4	C0003876		Abnormal bleeding	HP:0001892	C1458140
170	Blood/Bleeding	Easy bruising (with little/no trauma)	Easy bruising	HP:0000978	C0423798	Easy bruising	HP:0000978	C0423798	0.9	Easy bruising	HP:0000978	C0423798		Easy bruising	HP:0000978	C0423798		Increased tendency to bruise, Only a Little, Trauma, Traumatic injury, Wounds and Injuries	C0423798	4	C0003877		Bruising susceptibility	HP:0000978	C0423798
171	Blood/Bleeding	Persistent bleeding after trauma	Persistent bleeding after trauma	HP:0001934	C1844374	Persistent bleeding after trauma	HP:0001934	C1844374	0.9	Persistent bleeding after trauma	HP:0001934	C1844374						Persistent bleeding after trauma	C1844374		C0003878		Abnormal bleeding	HP:0001892	C1458140
172	Blood/Bleeding	Extramedullary hematopoiesis	Extramedullary hematopoiesis	HP:0001978	C1292120	Extramedullary hematopoiesis	HP:0001978	C1292120	1	Extramedullary hematopoiesis	HP:0001978	C1292120		Extramedullary hematopoiesis	HP:0001978	C1292120		Extramedullary Hematopoiesis (disorder)	C2613439		C0003879		Extramedullary hematopoiesis	HP:0001971	C0020532
173	Blood/Bleeding	Frequent nosebleeds (epistaxis)	Recurrent epistaxis	HP:0004406	C3809715	Recurrent epistaxis	HP:0004406	C3809715	0.9	Frequent nosebleeds	HP:0000421	C0014591	1	Frequent nosebleeds, epistaxis	HP:0000421	C0014591	1	Epistaxis, Epistaxis, CTCAE, Frequent nosebleeds	C0014591	2	C0003880		Epistaxis	HP:0000421	C0014591
174	Blood/Bleeding	Platelet abnormalities (too many/too few)	Abnormal platelet count	HP:0011873	C0580317	Abnormal platelet count	HP:0011873	C0580317	1	Platelet abnormalities	HP:0001872	C0151854		Platelet abnormalities	HP:0001872	C0151854					C0003881		Abnormal platelet count	HP:0011873	C0580317
175	Blood/Bleeding	Red blood cell abnormalities (anemia/polycythemia/thalassemia)	Abnormality of erythrocytes	HP:0001877	C0391870	Abnormality of erythrocytes	HP:0001877	C0391870	0.9	Abnormality of erythrocytes	HP:0001877	C0391870	2	Red blood cell abnormalities, anemia/polycythemia/thalassemia	H+M163P:0001877		1	Thalassemia, Anemia, Polycythemia, Abnormality of red blood cells, Anemia, CTCAE	C0391870	4	C0003882		Abnormality of erythrocytes	HP:0001877	C0391870
176	Blood/Bleeding	White blood cell abnormalities (leukocytosis/leukopenia)	Abnormal leukocyte count	HP:0011893	C0580531	Abnormal leukocyte count	HP:0011893	C0580531	0.9	polycythemia	HP:0001901	C0032461	2					Leukocytosis, Leukopenia, Leukocytosis, CTCAE, White blood cell abnormality, White blood cell count decreased, White blood cell count increased (lab result)	C0023518	5	C0003883		Abnormal leukocyte count	HP:0011893	C0580531
177	Oral Health	Gum disease (loss of tissue around teeth)	Periodontitis	HP:0000704	C0017563	Generalised periodontal disease	HP:0011058	C4280345	0.9	Periodontitis	HP:0000704	C0017563	1	Gum disease	HP:0000704	C0017563		Gingival Diseases, Periodontal Diseases	C0017563	1	C0017563		Periodontal disease	HP:0000169	C0016049
178	Oral Health	Gingivitis (inflamed/red/swollen gums)	Gingival inflammation	HP:0000230	C0017574	Gingivitis	HP:0000230	C0017574	1	Gingival inflammation	HP:0000230	C0017574		Gingivitis, swollen gums	HP:0000230	C0017574	1	Gingivitis, Dental swelling, Redness	C0017574	2	C0017574		Gingivitis	HP:0000234	C4021812
179	Oral Health	Oral herpes (blisters/ulcers on gums/tongue)	Oral herpes	HP:0410028	C1274321	Recurrent oral herpes	HP:0410028	C1274321	0.85	Oral herpes	HP:0410028	C1274321	1	Oral herpes	HP:0410028	C1274321		Bulla, Ulcer, Abnormal blistering of the skin, Blistering eruption, Oral herpes simplex infection, Residue on Tongue	C0005758	5	C0017575		Oral ulcers	HP:0000155	C0149745
180	Oral Health	Spontaneous tooth fracture	Spontaneous tooth fracture	HP:0025124	C2674620	Spontaneous tooth fracture	HP:0025124	C2674620	1	Spontaneous tooth fracture	HP:0025124	C2674620		Spontaneous tooth fracture	HP:0025124	C2674620		Fragile teeth	C2674620		C0017576		Tooth fractures	HP:0006483	C1290508
181	Oral Health	Unusual number of teeth (more/less)	Abnormal number of teeth	HP:0006483	C1290508	Abnormal number of teeth	HP:0006483	C1290508	1	Abnormal number of teeth	HP:0006483	C1290508									C0017577		Abnormal number of teeth	HP:0011069	C0040457
182	Oral Health	Malformed teeth	Malformed teeth	HP:0006482	C0040427	Abnormality of dental morphology	HP:0006482	C0040427	0.9	Malformed teeth	HP:0006482	C0040427		Malformed teeth	HP:0006482	C0040427		Tooth Abnormalities	C0040427		C0040427		Abnormality of dental morphology	HP:0006482	C0040427
183	Oral Health	Abnormality of primary teeth (baby teeth problems)	Abnormality of primary teeth	HP:0006481	C4021596	Abnormality of primary teeth	HP:0006481	C4021596	1	Abnormality of primary teeth	HP:0006481	C4021596	1	Abnormality of primary teeth, baby teeth problems	HP:0006481	C4021596	1	Abnormality of primary teeth	C4021596		C0040428		Abnormality of primary dentition	HP:0011062	C4023556
184	Oral Health	Abnormality of the dental root	Abnormality of the dental root	HP:0006486	C1291070	Abnormality of the dental root	HP:0006486	C1291070	1	Abnormality of the dental root	HP:0006486	C1291070		Abnormality of the dental root	HP:0006486	C1291070		Abnormal form of root of tooth	C1291070		C0040429		Abnormality of the dental root	HP:0006487	C1855340
185	Oral Health	Abnormality of dental pulp	Abnormality of dental pulp	HP:0006479	C4025042	Abnormality of the dental pulp	HP:0006479	C4025042	1	Abnormality of dental pulp	HP:0006479	C4025042		Abnormality of dental pulp	HP:0006479	C4025042		Abnormality	C1704258		C0040430		Abnormality of the dental pulp	HP:0011087	C0266034
186	Oral Health	Over/under bite (malocclusion)	Misalignment of teeth	HP:0000692	C1852504	Misalignment of teeth	HP:0000692	C1852504	1	malocclusion	HP:0000689	C4280614						Malocclusion, bite injury	C0024636	1	C0040431		Malocclusion	HP:0000687	C1844813
